# Supplementary material for: The East Asian Transmission of Southern Song Zen Buddhist Painting Base on Compositional Perspective
Source: Research Square preprint supplement (doi:10.21203/rs.3.rs-7326870/v1), 2025-11-03
Supplement: Supplementary file 1 [file 0deebefb34da615430abf0fe.docx]

**Tab.1 Block-Mean Visualization**

| Liang Kai (B1) | Muqi (C1) |
| --- | --- |
| 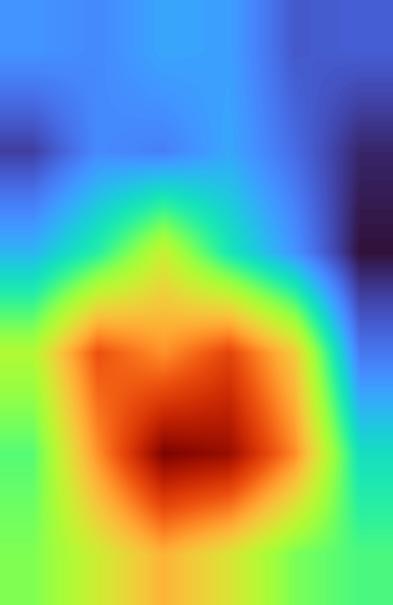 | 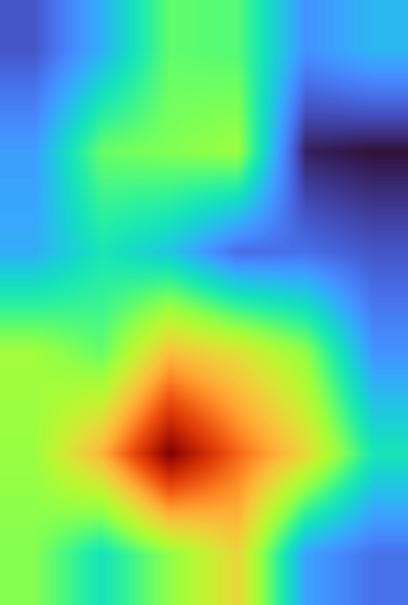 |

**Tab.2 Research Samples**

| No. | Artist | Primary Pictorial Elements | **Representative Exemplars of Hanging Scroll Figure Paintings** |
| --- | --- | --- | --- |
| A1 | Sesshū Tōyō（14） | Figure | 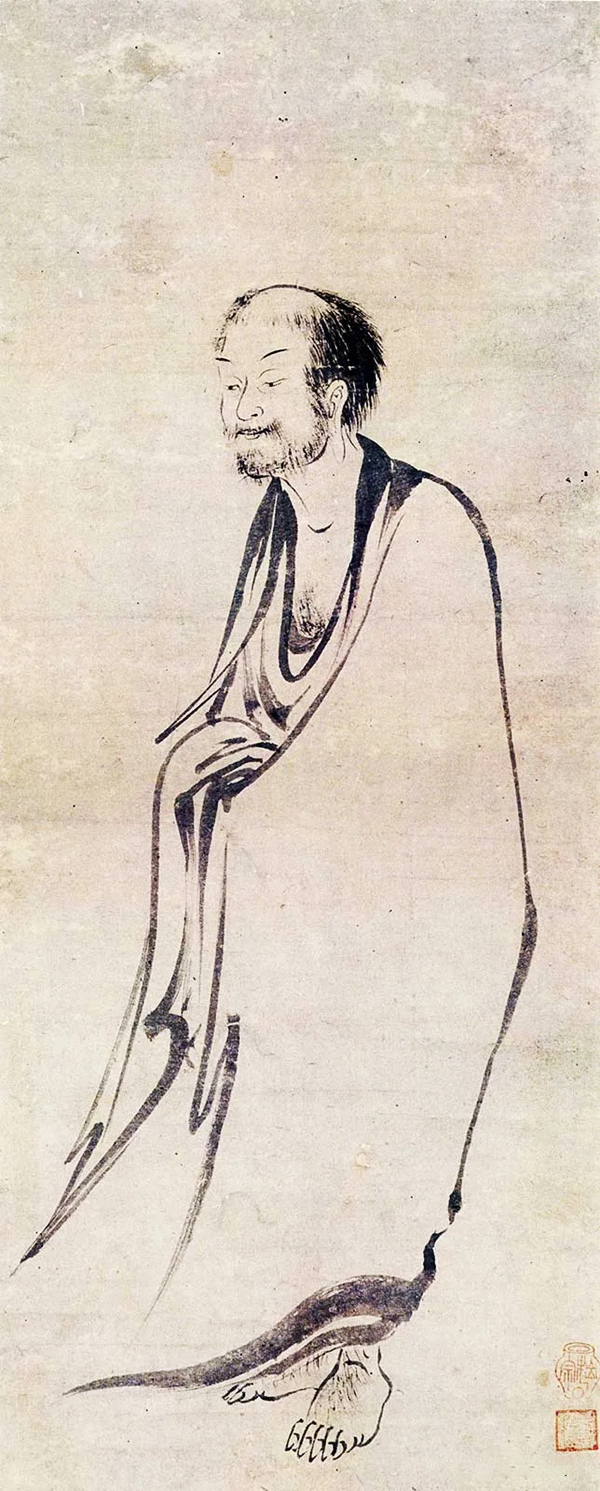 |
| B1 | Liang Kai（21） | Figure | 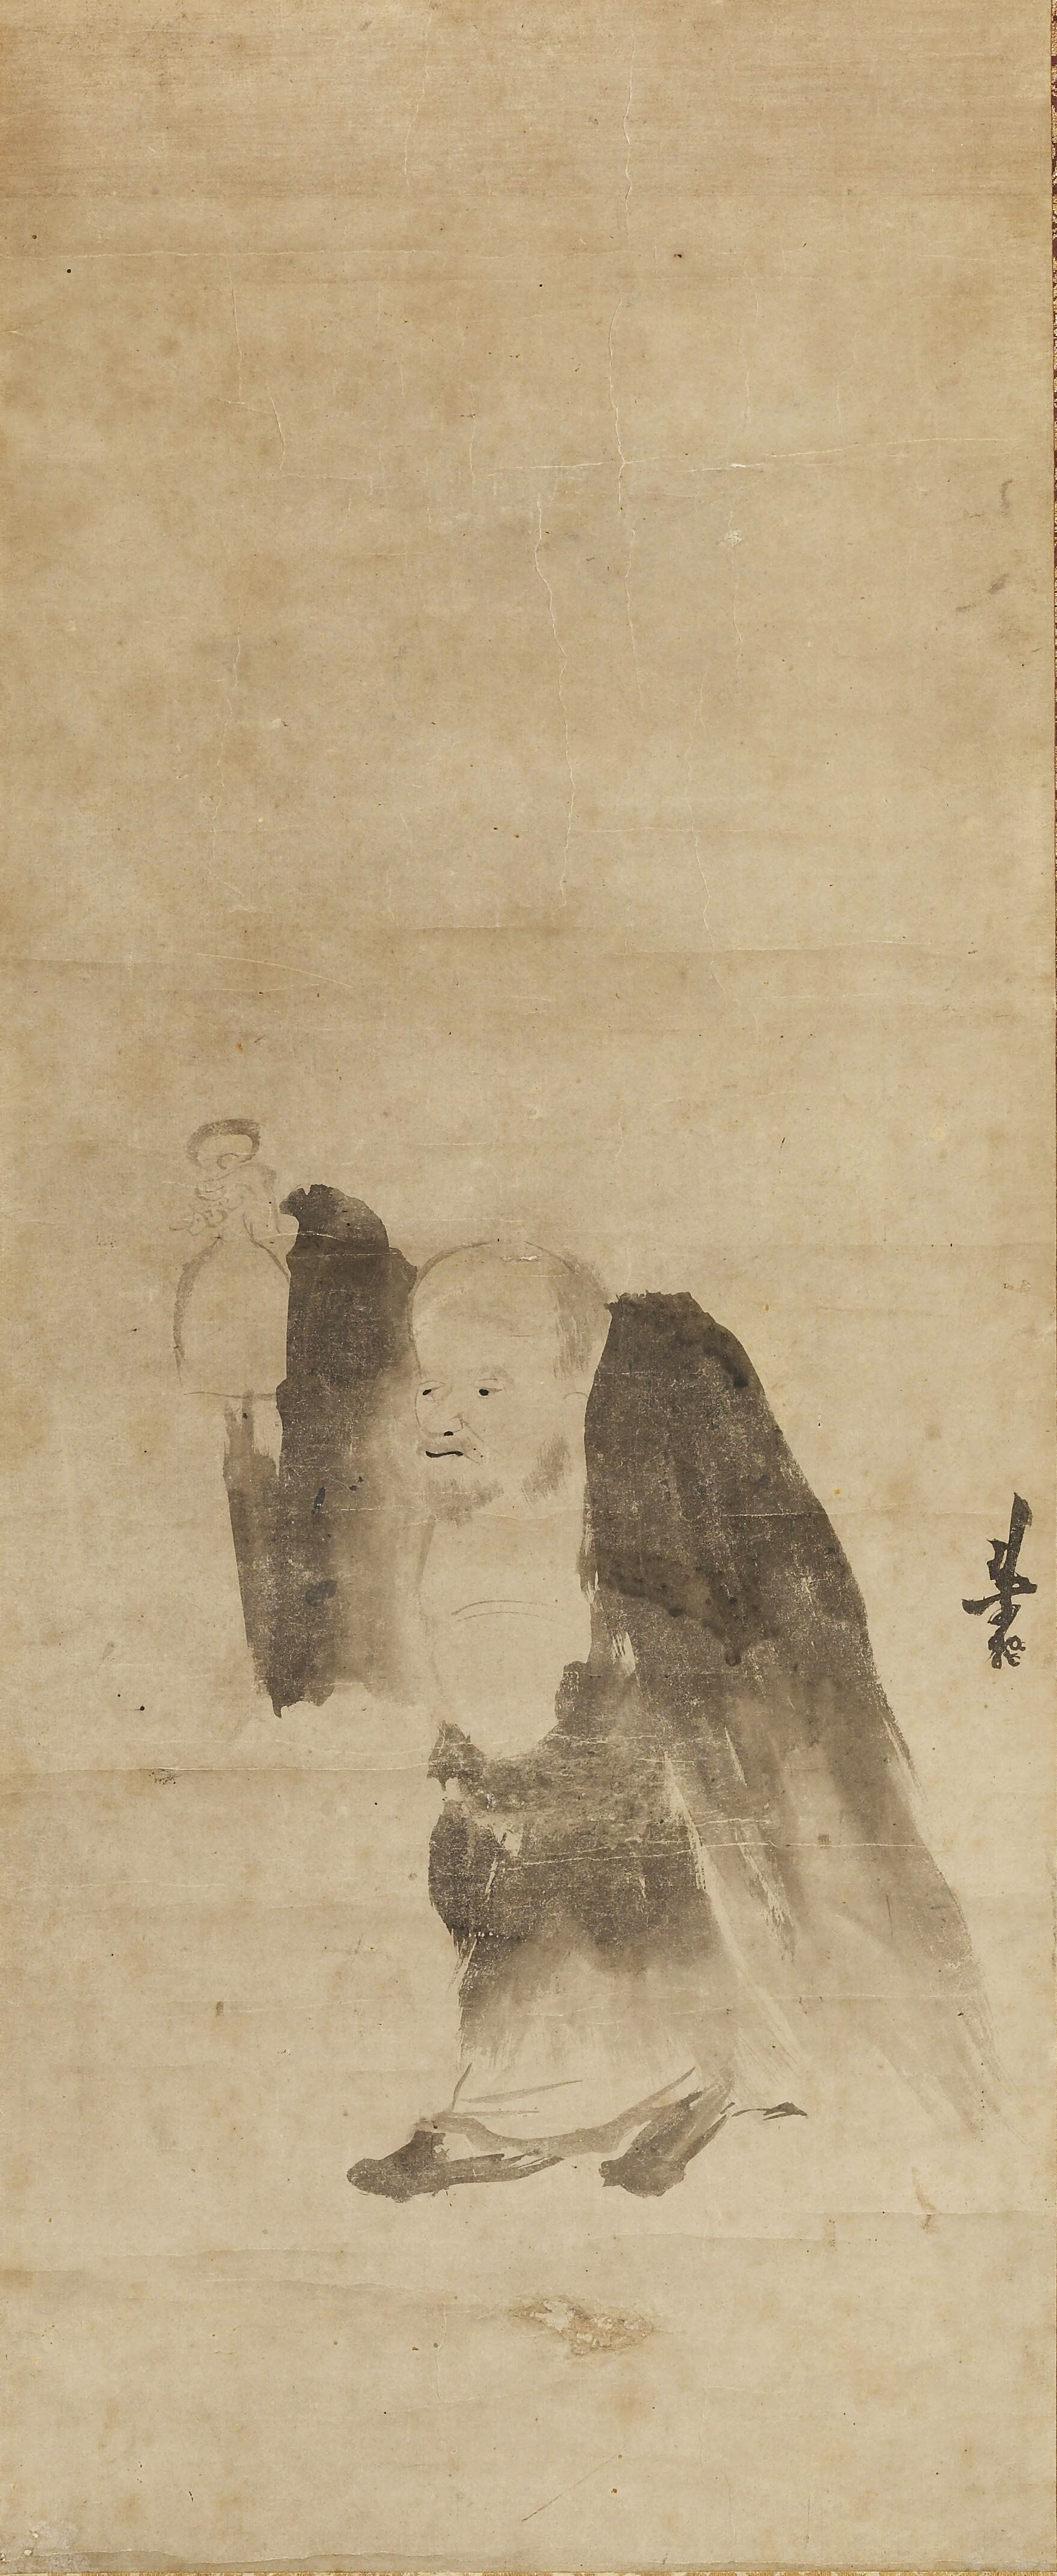 |
| C1 | Muqi（14） | Tree, Figure | 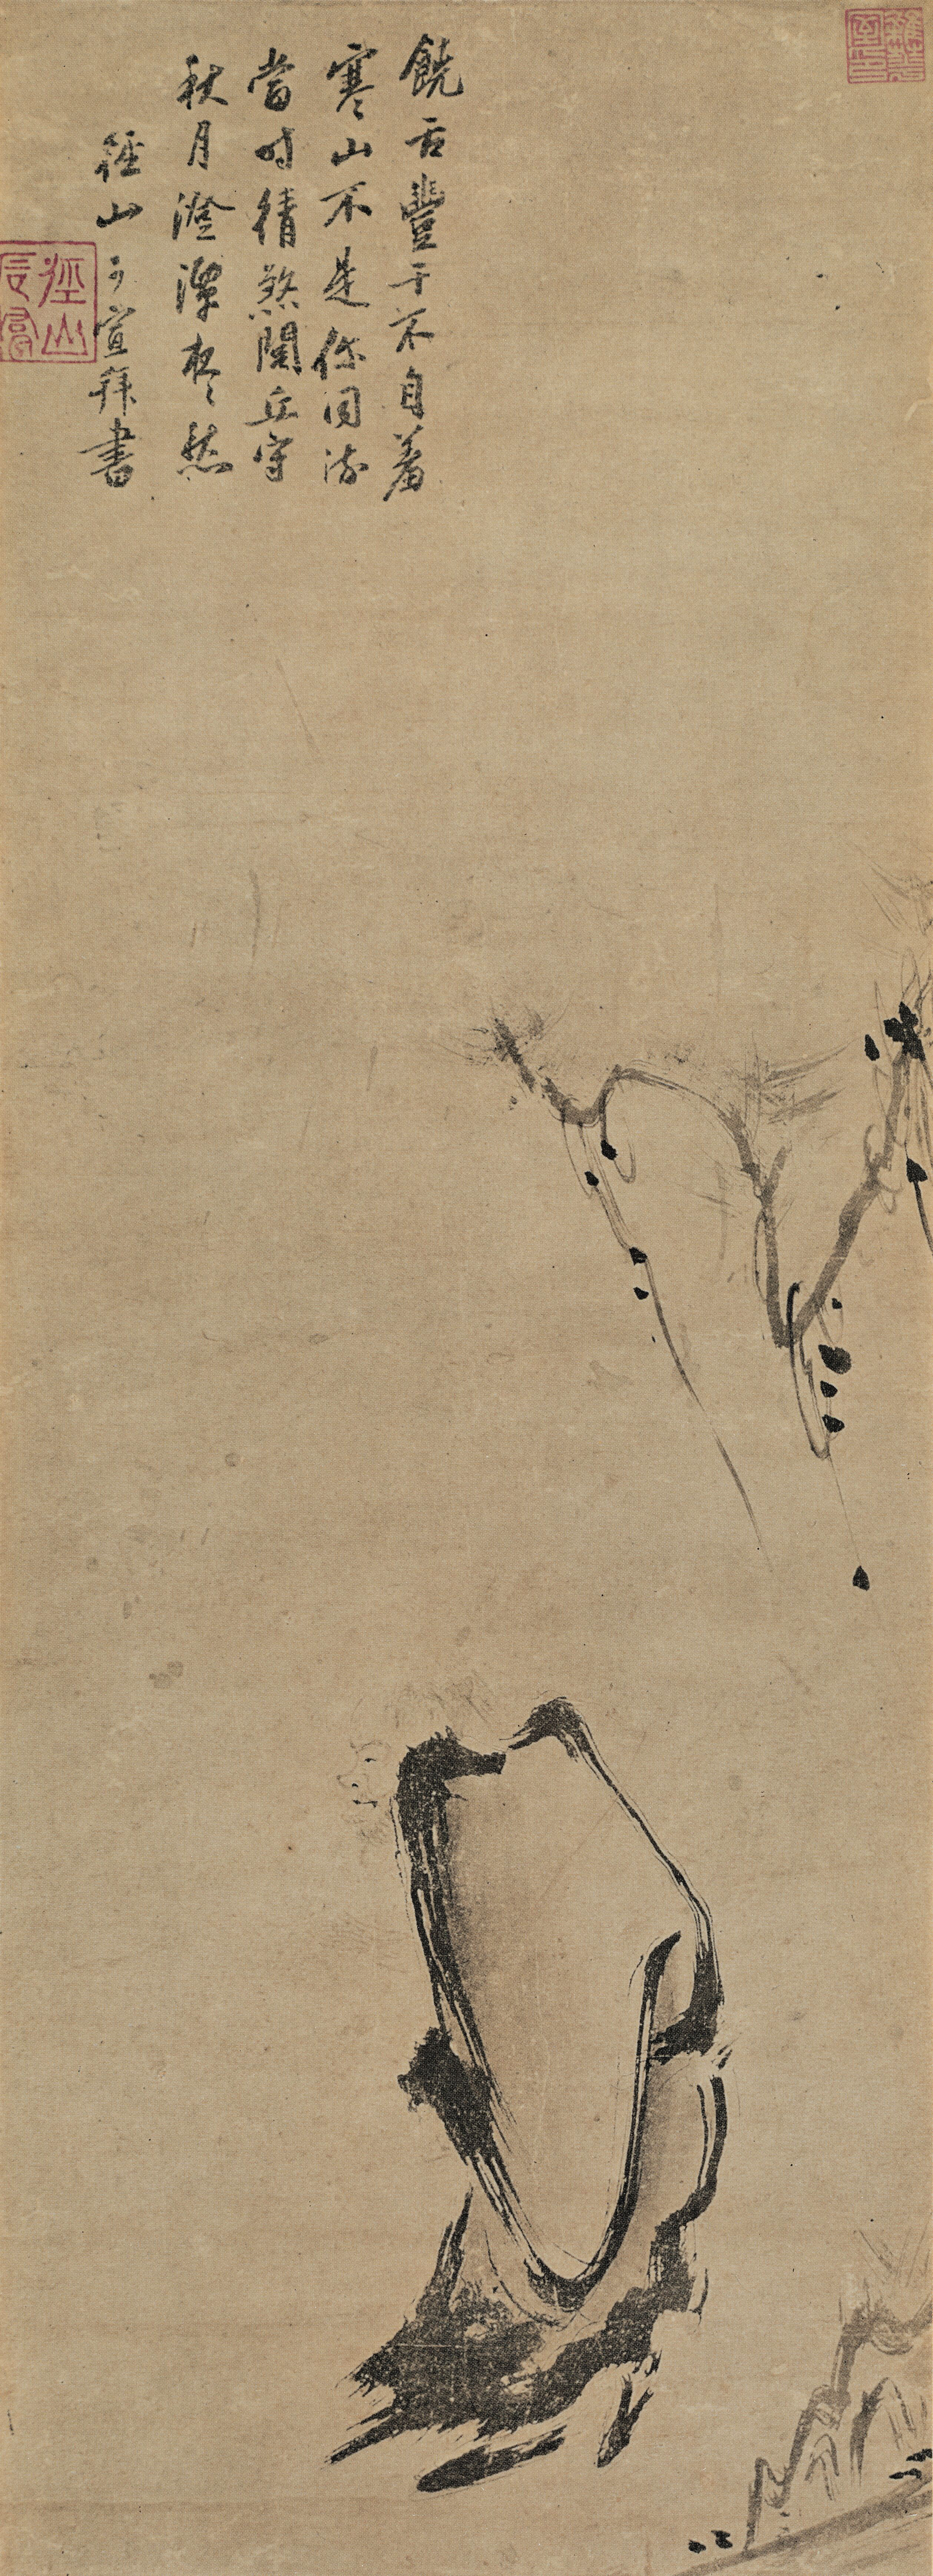 |

**Tab.3 Grid Configuration Testing**

| Sample | 3*3 | 4*4 | 5*5 | 6*6 |
| --- | --- | --- | --- | --- |
| 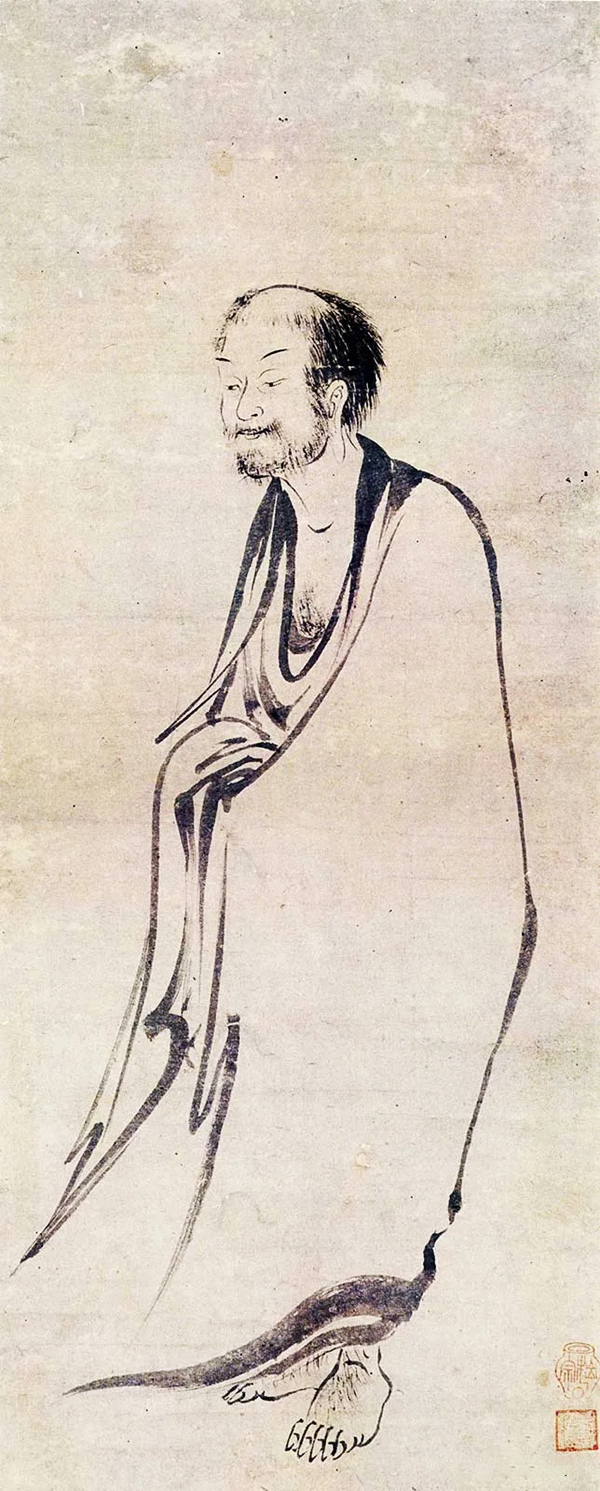 | 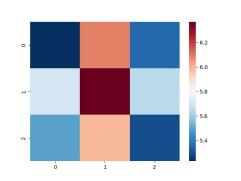 | 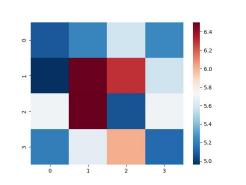 | 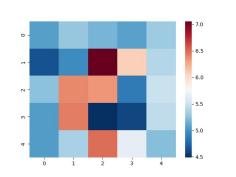 | 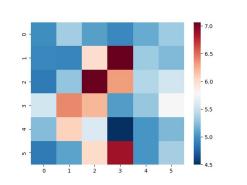 |
| 7*7 | 8*8 | 9*9 | 10*10 |
| 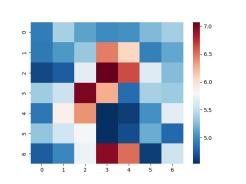 | 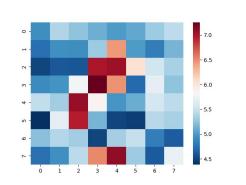 | 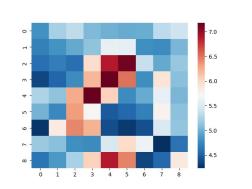 | 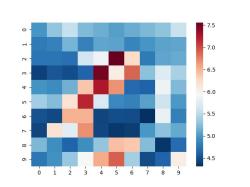 |

**Tab.4 Block-Entropy Heatmap**

| Sesshū Tōyō's Hanging Scroll Exemplar | **Heatmap** | **Liang Kai's Hanging Scroll Exemplar** | **Heatmap** | **Muqi's Hanging Scroll Exemplar** | **Heatmap** |
| --- | --- | --- | --- | --- | --- |
| 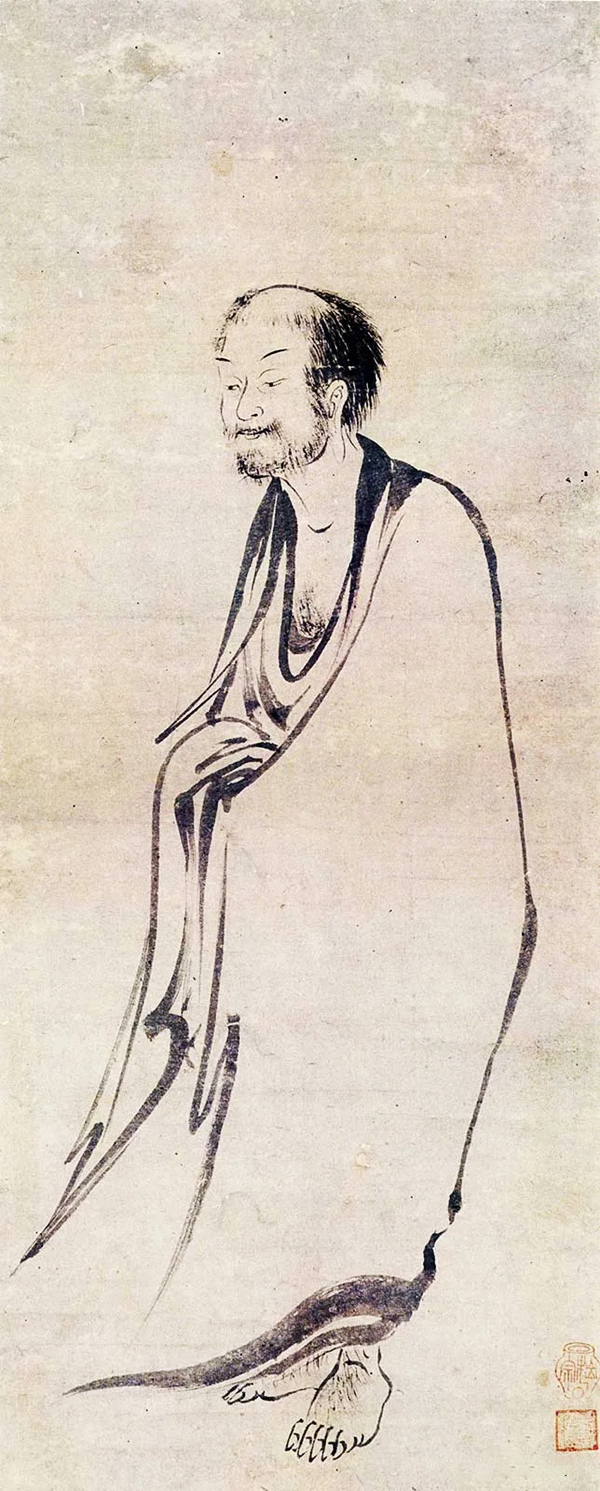 | 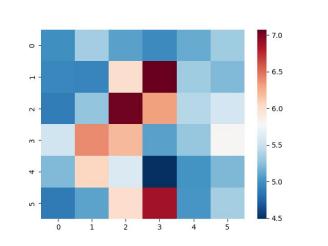 | 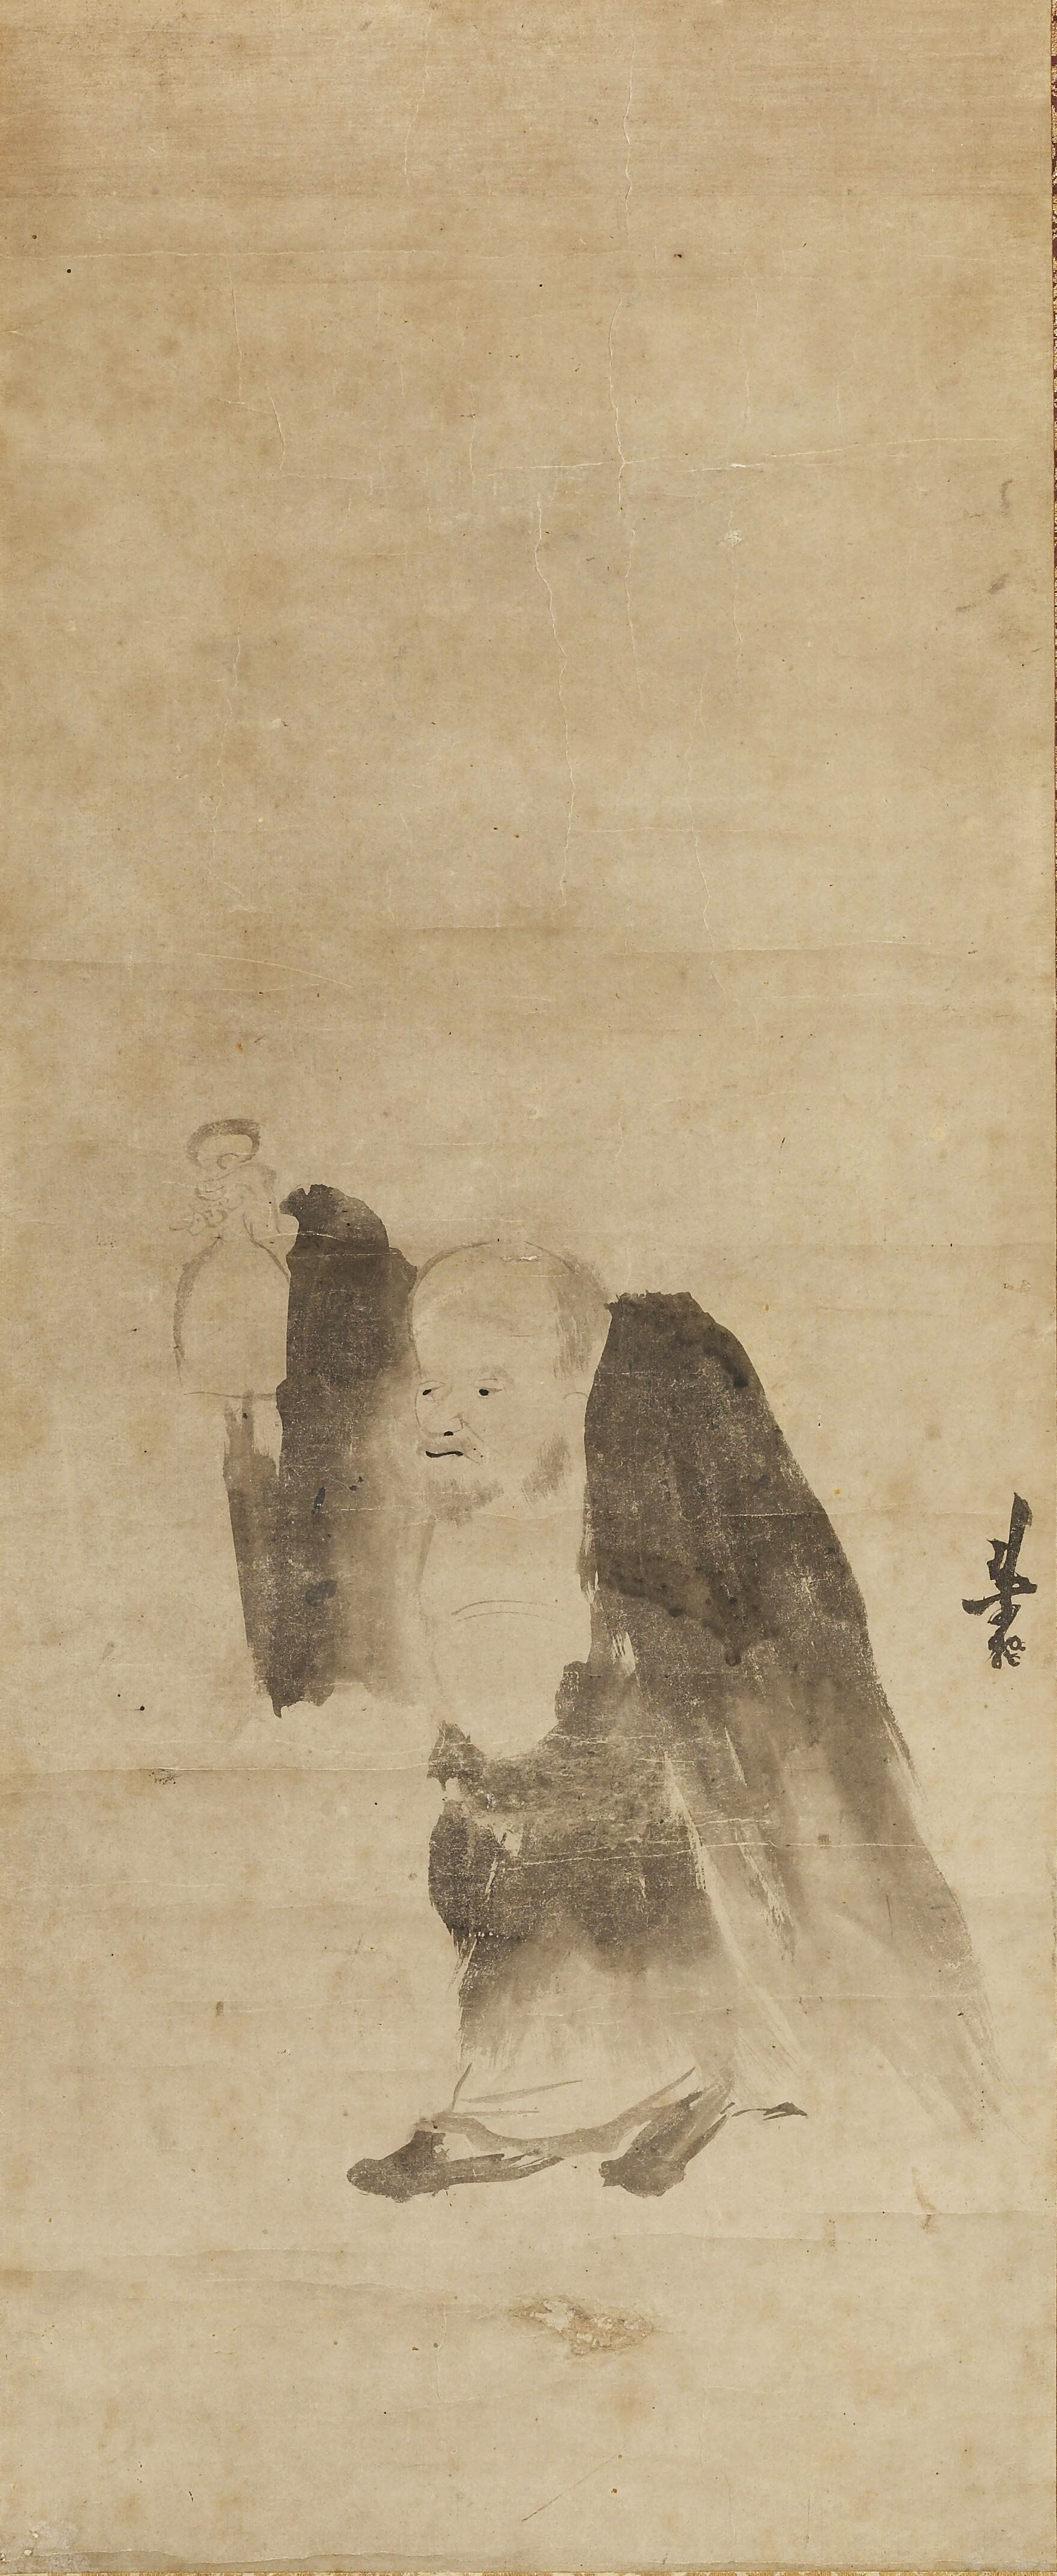 | 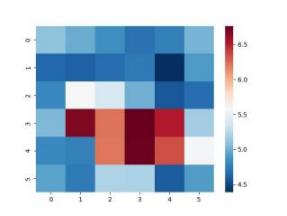 | 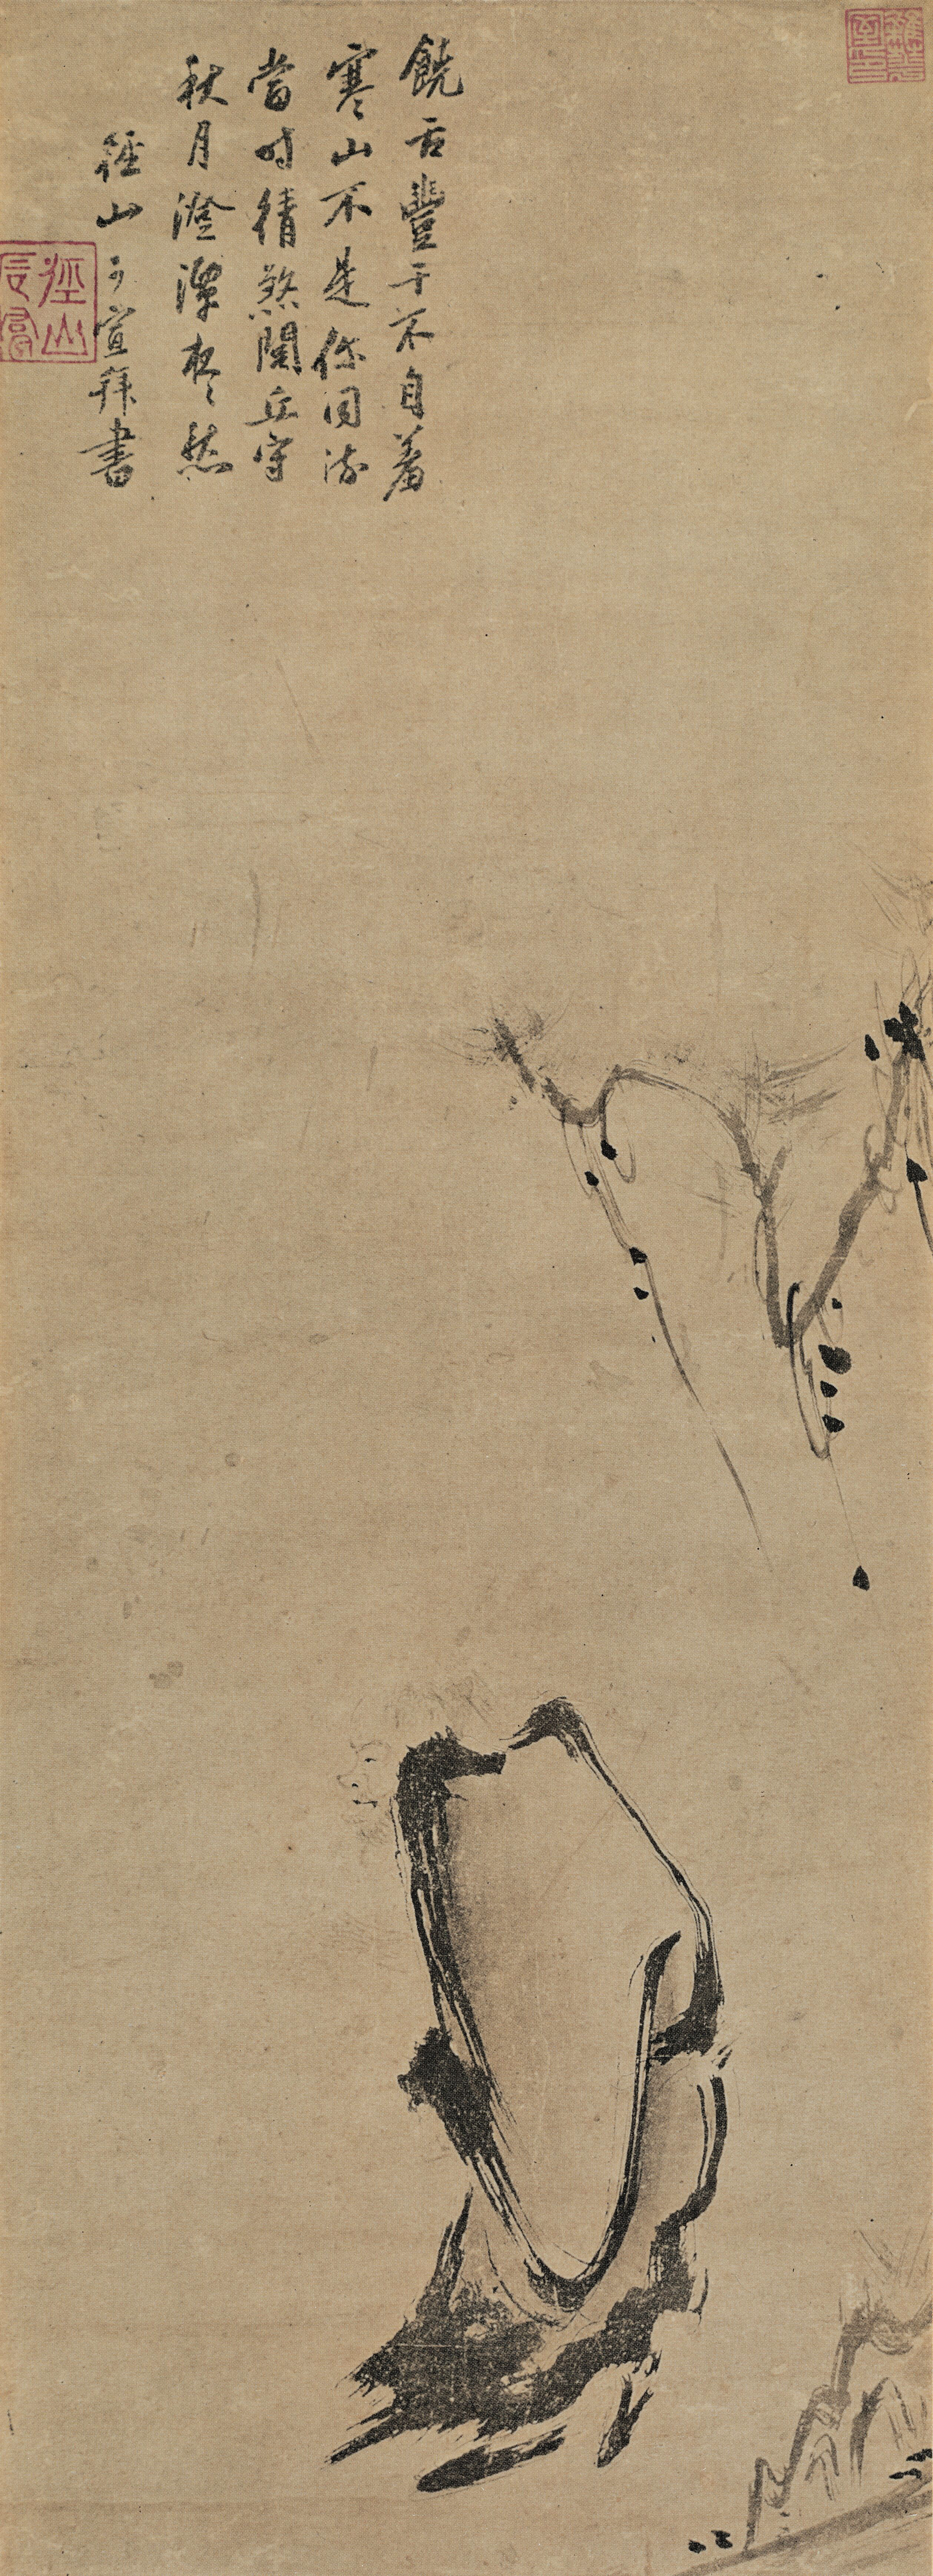 | 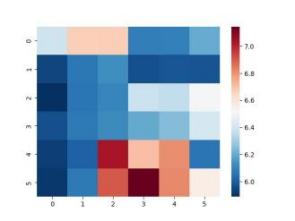 |

**Tab.5 Block-Mean Values by Sample**
(Subtitle: Yellow = high-entropy regions; Orange= peak entropy)

| **Sesshū Tōyō: Hanging Scroll Figure Painting (Cohort A1)** | | | | | | |
| --- | --- | --- | --- | --- | --- | --- |
| V | 1 | 2 | 3 | 4 | 5 | 6 |
| 1 | 5.330965 | 5.491103571 | 5.319365429 | 5.288063214 | 5.243429286 | 5.491784786 |
| 2 | 5.415453929 | 5.522857429 | 5.587036214 | 5.787634429 | 5.523223429 | 5.761788786 |
| 3 | 5.634409857 | 5.785595857 | 6.265779143 | 6.184218357 | 5.815292929 | 5.692836643 |
| 4 | 5.458724 | 6.056173429 | 6.289660857 | 6.134526786 | 6.300679857 | 5.845165786 |
| 5 | 6.0041205 | 6.303179857 | 6.5816925 | 6.232976 | 6.437443571 | 6.364609429 |
| 6 | 5.7755145 | 6.073829571 | 6.238960786 | 6.436237429 | 6.202503571 | 6.067524143 |
| **Liang Kai: Hanging Scroll Figure Painting (Cohort B1)** | | | | | | |
| V | 1 | 2 | 3 | 4 | 5 | 6 |
| 1 | 5.538029952 | 5.519564524 | 5.563975381 | 5.55342619 | 5.449923143 | 5.45827419 |
| 2 | 5.413822905 | 5.522493286 | 5.505671905 | 5.565569667 | 5.477313524 | 5.38050181 |
| 3 | 5.586605571 | 5.704703762 | 5.88931619 | 5.679494762 | 5.538036429 | 5.353863476 |
| 4 | 5.858576619 | 6.139633048 | 6.056291095 | 6.159709667 | 5.967844667 | 5.493812048 |
| 5 | 5.756172905 | 6.058608333 | 6.315659238 | 6.284803238 | 6.062931571 | 5.661157905 |
| 6 | 5.795939714 | 5.899465095 | 6.00866719 | 5.919443143 | 5.791311857 | 5.743912 |
| **Muqi: Hanging Scroll Figure Painting (Cohort C1)** | | | | | | |
| V | 1 | 2 | 3 | 4 | 5 | 6 |
| 1 | 5.807024429 | 5.921940786 | 6.082036071 | 6.071436786 | 5.882149 | 5.9294845 |
| 2 | 5.897281643 | 6.087619143 | 6.108795357 | 6.133173071 | 5.743580429 | 5.726617286 |
| 3 | 5.9166605 | 6.005331 | 5.9539795 | 5.833915643 | 5.838683143 | 5.805301929 |
| 4 | 6.140942857 | 6.086466643 | 6.274420429 | 6.219081929 | 6.120742 | 5.883303429 |
| 5 | 6.131446786 | 6.291227429 | 6.556164214 | 6.378352929 | 6.234733643 | 6.004654429 |
| 6 | 6.111548071 | 5.999055071 | 6.1227145 | 6.236287786 | 5.9027315 | 5.839388214 |

**Tab.6 Quartile Distribution of Block Means**

| **Cohort** | **Min** | **Q1 (25th Percentile)** | **Median (Q2)** | **Q3 (75th Percentile)** | **Max** |
| --- | --- | --- | --- | --- | --- |
| A1 | 5.243429286 | 5.522857429 | 5.815292929 | 6.232976 | 6.5816925 |
| B1 | 5.353863476 | 5.519564524 | 5.679494762 | 5.919443143 | 6.315659238 |
| C1 | 5.726617286 | 5.883303429 | 6.005331 | 6.131446786 | 6.556164214 |

**Tab.7 Block-Mean Visualizations**

| **Sesshū Tōyō (A1)** | **Liang Kai (B1)** | **Muqi (C1)** |
| --- | --- | --- |
| 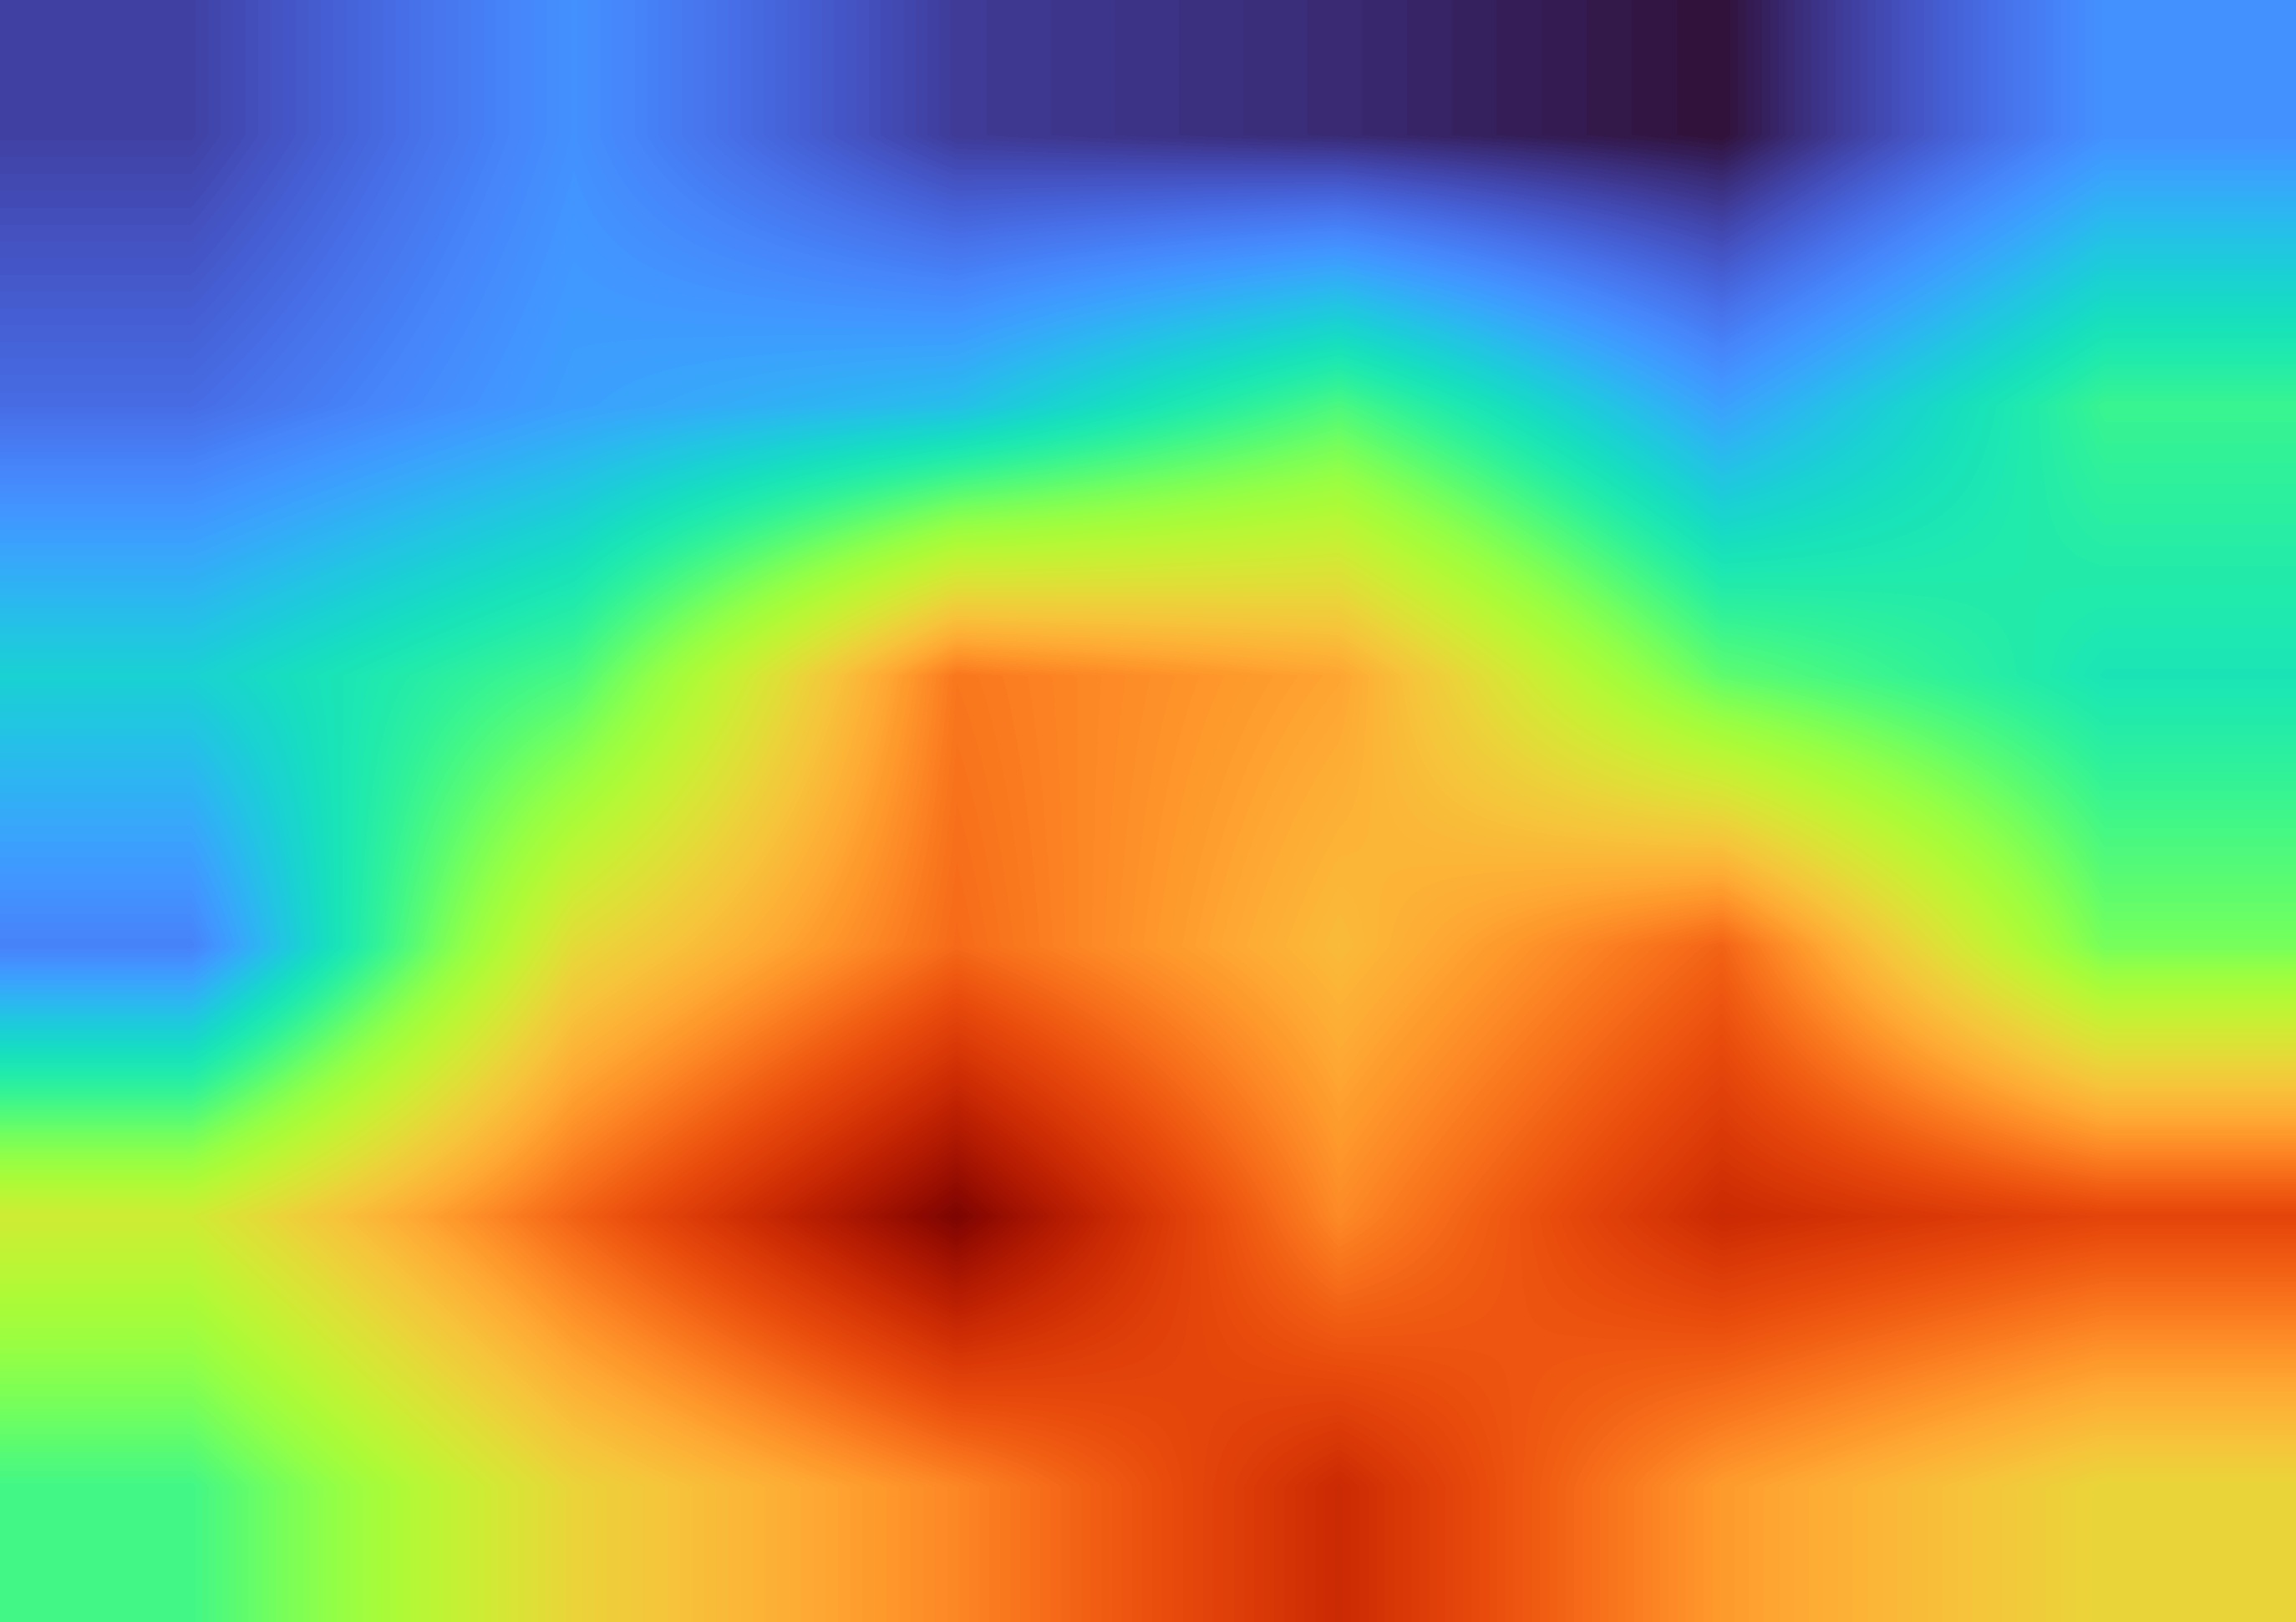 | 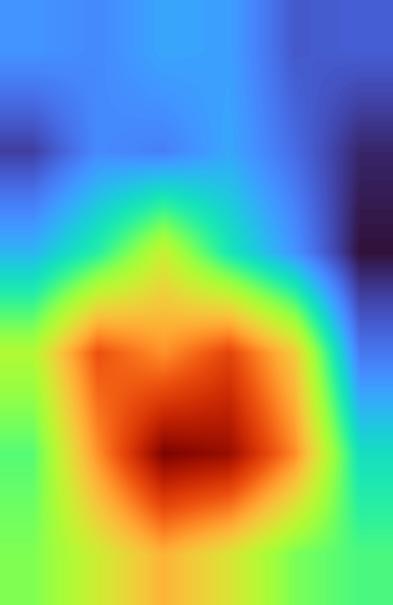 | 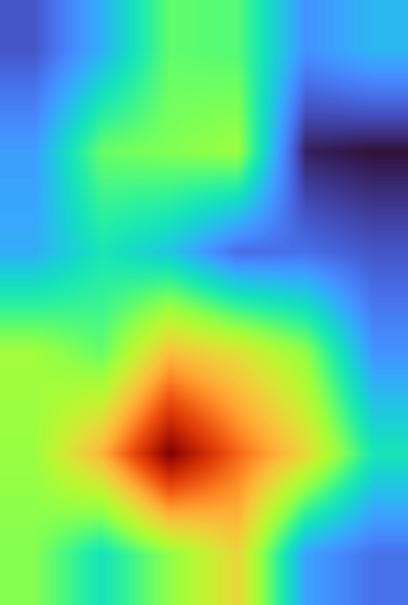 |

**Table 8. Comparative Entropy Analysis: Sesshū Tōyō, Liang Kai, and Muqi**

|  | Sesshū Tōyō (A1) Analysis | Liang Kai (B1) Analysis | Muqi (C1) Analysis |
| --- | --- | --- | --- |
| Max block mean | 6.5816925 at V(3,5) | 6.315659238 at V(3,5) | 6.556164214 at V(3,5) |
| 75th percentile | 6.232976 | 5.919443143 | 6.131446786 |
| High-entropy range | 6.5816925–6.232976 | 6.315659238–5.919443143 | 6.556164214–6.131446786 |
| High-entropy blocks | V(2,5), V(3,3)–V(3,6), V(4,5)–V(4,6), V(5,4)–V(5,5), V(6,5) | V(2,4)–V(2,5), V(3,4)–V(3,6), V(4,4)–V(4,6), V(5,4)–V(5,5) | V(1,4)–V(1,5), V(2,5), V(3,4)–V(3,5), V(4,2), V(4,4)–V(4,6), V(5,5) |
| Distribution pattern | ★ 79% high-entropy blocks in Row 5  ★ Central concentration > lateral zones  ★ Primary subjects cluster near bottom 1/3 region with central emphasis | ★ 62% high-entropy blocks in Rows 4–5  ★ Central dominance > lateral areas  ★ Subject concentration in bottom 1/2 region with central alignment | ★ 71% high-entropy blocks in Row 5  ★ Left-central prevalence > right zones  ★ Subject focus in bottom 1/2 region with left-central bias |

**Tab.9 Representative Artworks: Sesshū Tōyō, Liang Kai, and Muqi**

| A1  **Sesshū Tōyō Exemplars** | 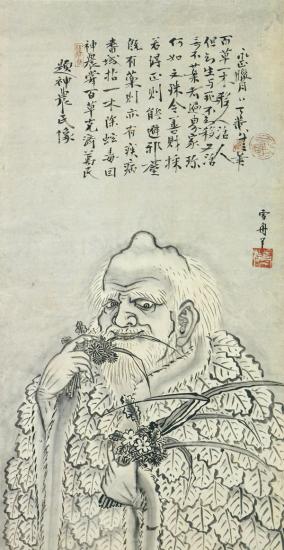《神农图》  **Divine Farmer (Shennong)** (Cultural Note: Shennong, mythical inventor of agriculture) | 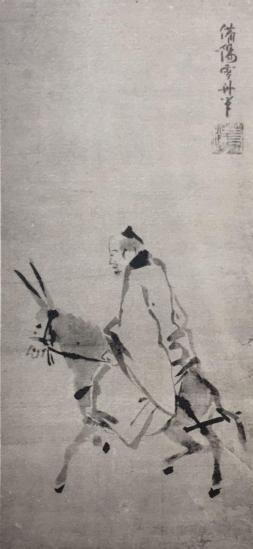《杜子美图》  **Poet Du Fu** (Historical Context: Du Fu (712-770), Tang dynasty poet) | 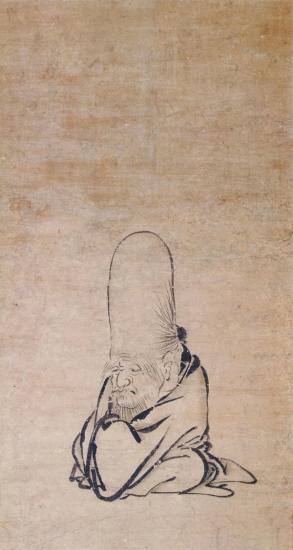《寿星图》  **Longevity Deity (Shouxing)** (Iconography: Star God of Southern Polar Constellation) |
| --- | --- | --- | --- |
| B1  **Liang Kai Exemplars** | 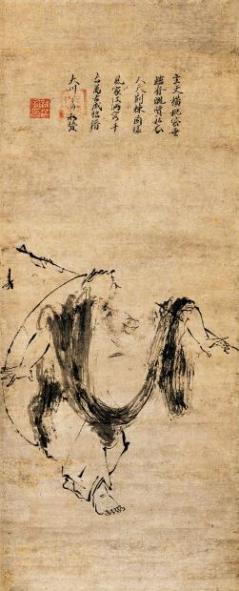  《布袋图》  **Budai Monk** (Zen Significance: Laughing Buddha prototype) | 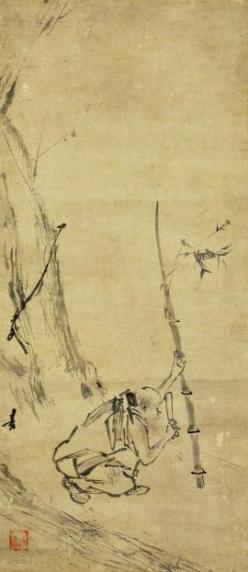  《六祖斫竹图》  **Sixth Patriarch Cutting Bamboo** (Key Scene: Huineng demonstrating sudden enlightenment) | 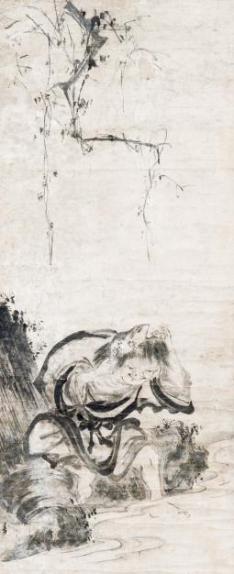  《刘海仙人图》  **Immortal Liu Hai** (Daoist Tradition: Coin-dancing toad tamer) |
| C1  **Muqi Exemplars** | 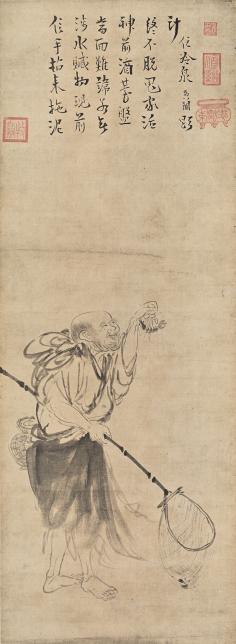  《蚬子和尚图》  **Monk Xianzi (Clam Gatherer)** (Zen Folklore: Tang dynasty eccentric monk) | 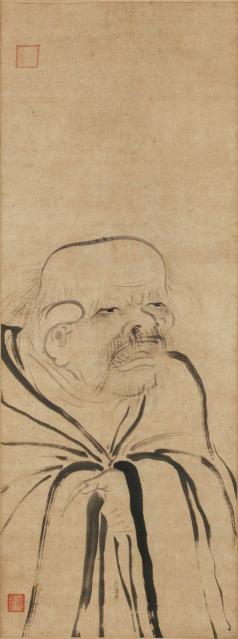  《老子图》  **Laozi** (Philosophical Icon: Founder of Daoism) | 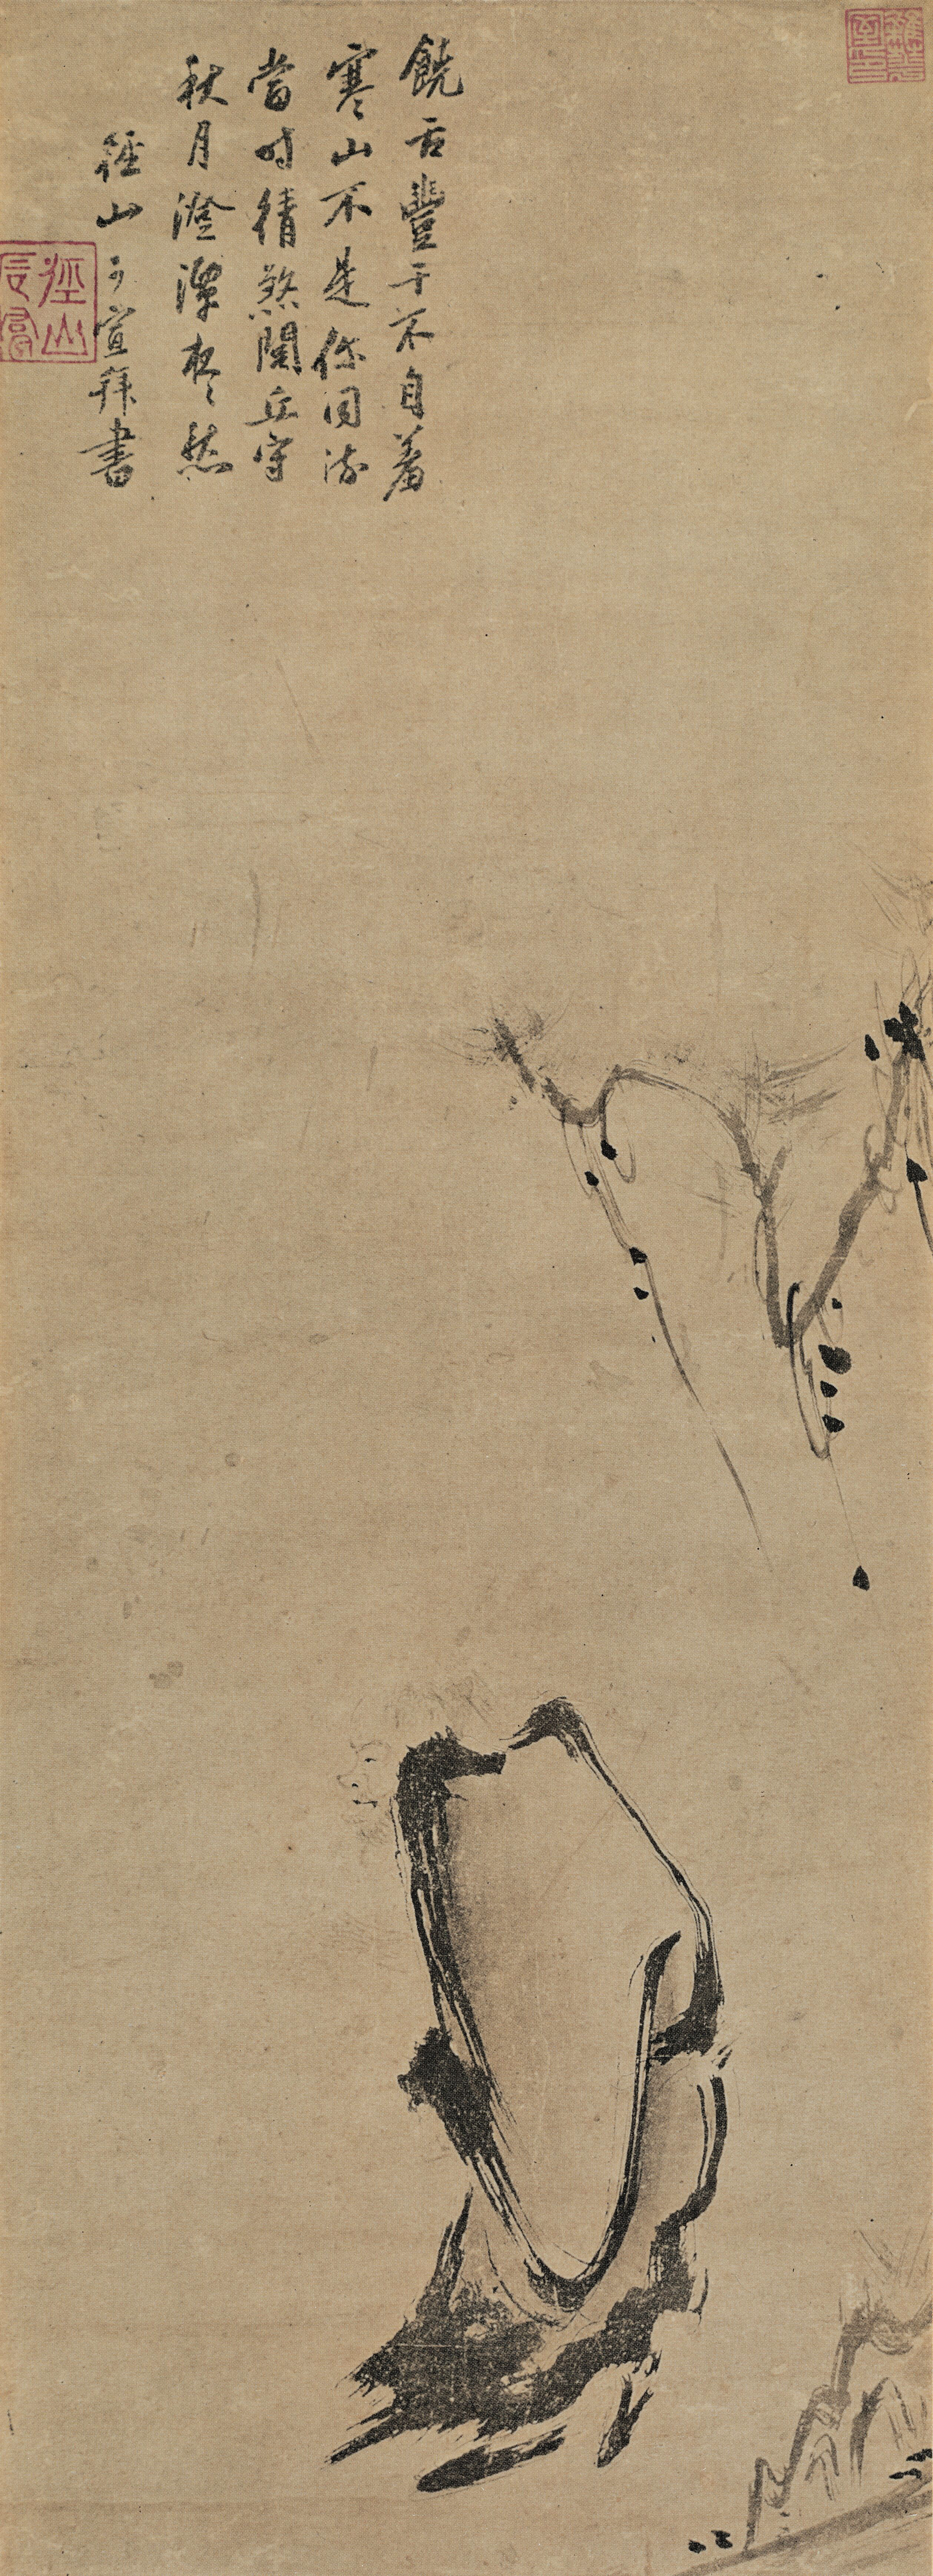  《丰干图》  **Fenggan** (Zen Triad: Companion to Hanshan and Shide) |

**Tab.10 Comparative Cohort Sample**

| No. | Artist | Primary Pictorial Elements | **Representative Exemplars of Hanging Scroll Figure Paintings** |
| --- | --- | --- | --- |
| A1 | Sesshū Tōyō（14） | Figure | 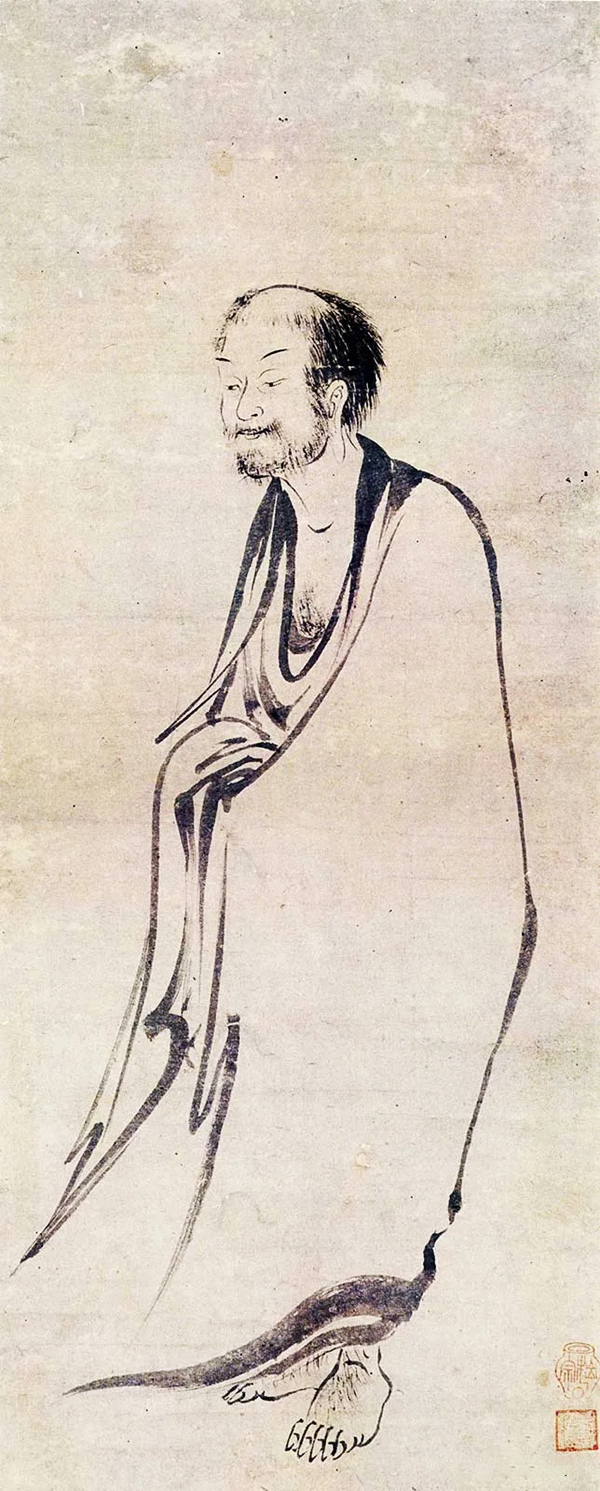 |
| D1 | Liu Songnian（9） | Trees, Tables and chairs, Believers, Railings | 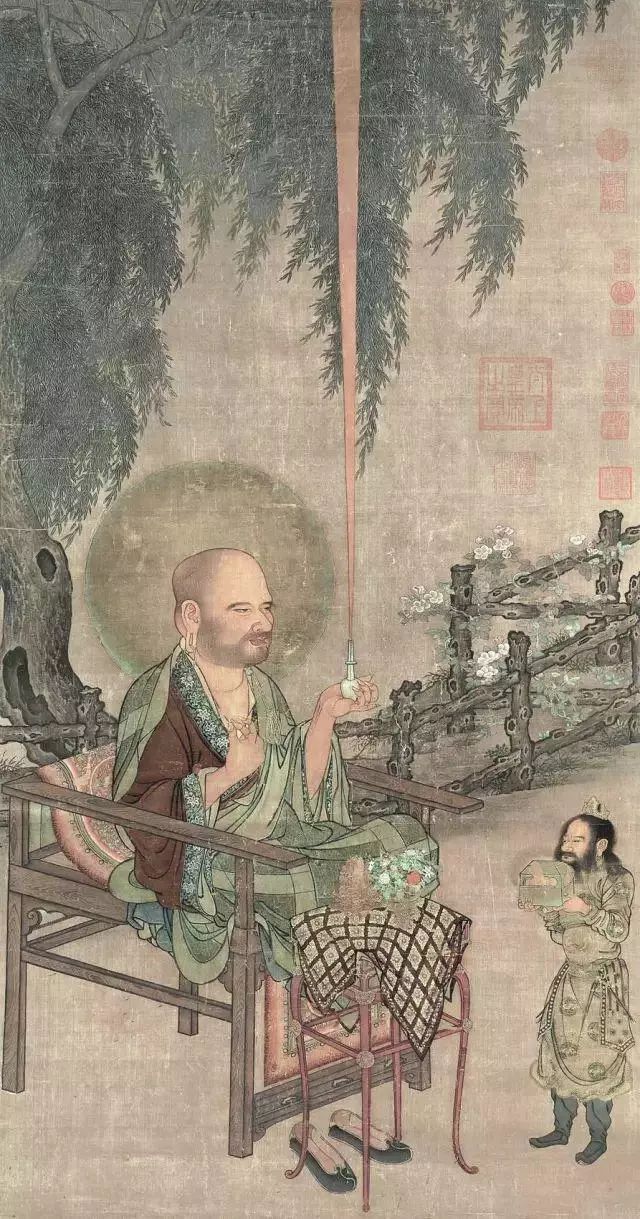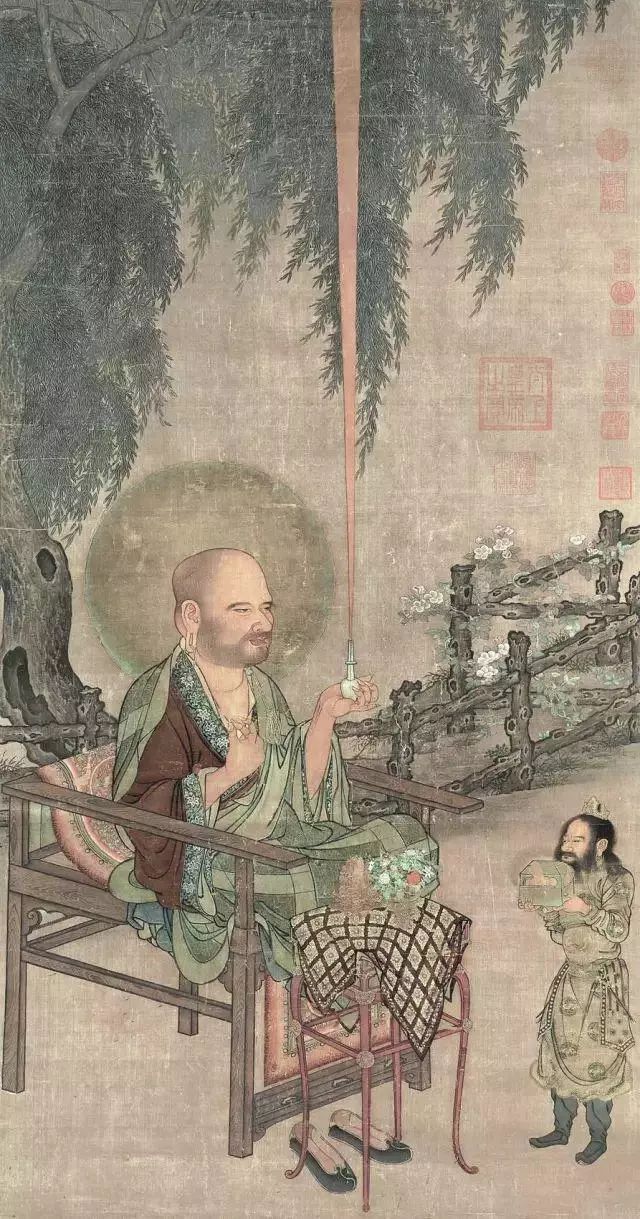 |

**Tab.11 Block-Entropy Heatmap**

| Sesshū Tōyō's Hanging Scroll Exemplar | **Heatmap** | Liu Songnian's Hanging Scroll Exemplar | **Heatmap** |
| --- | --- | --- | --- |
| 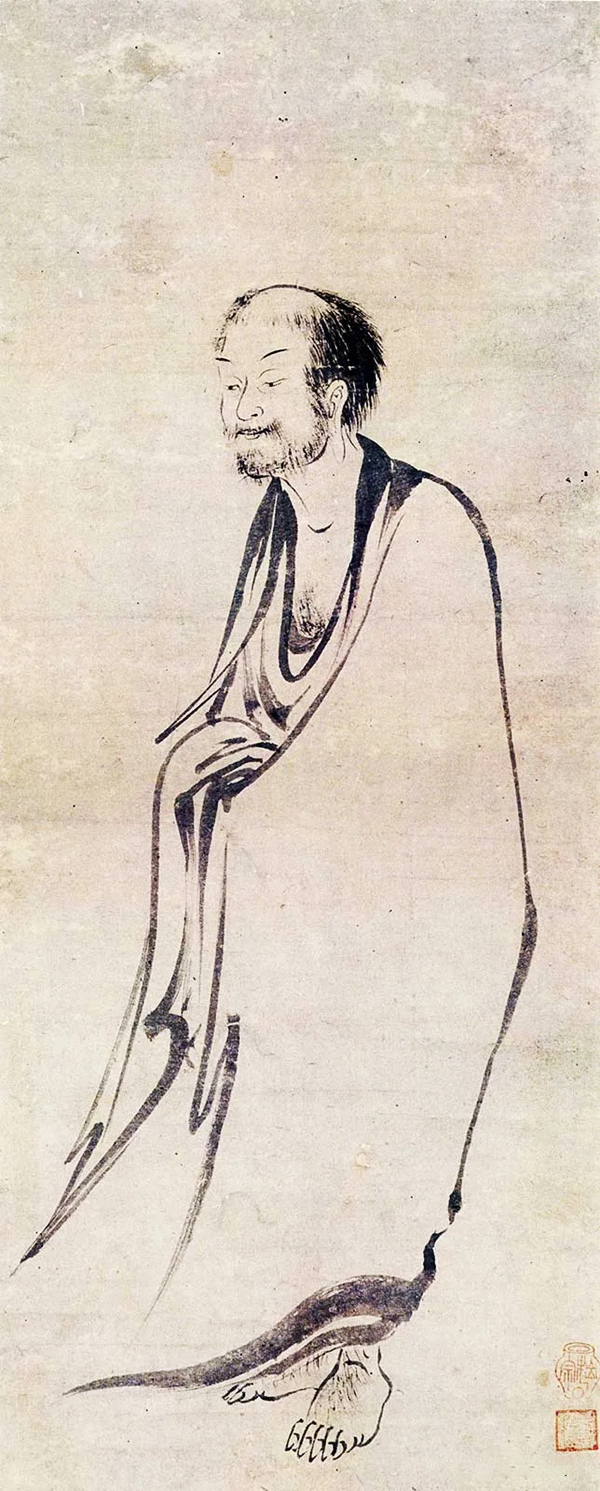 | 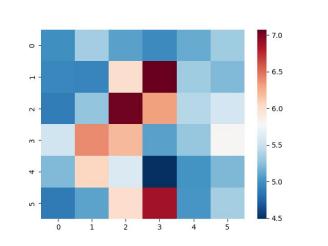 | 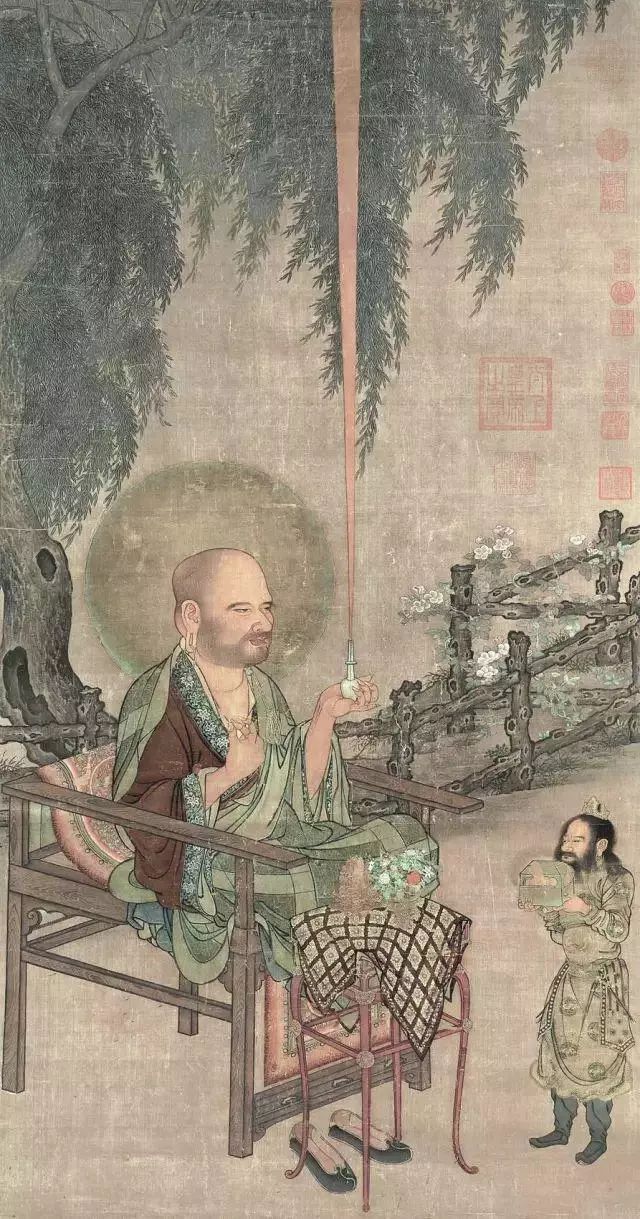 | 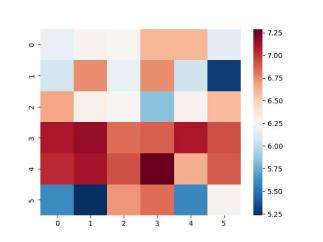 |

**Tab.12 Block-Mean Values by Sample**(Subtitle: Yellow = high-entropy regions; Orange-red = peak entropy)

| **Sesshū Tōyō: Hanging Scroll Figure Painting (Cohort A1)** | | | | | | |
| --- | --- | --- | --- | --- | --- | --- |
| V | 1 | 2 | 3 | 4 | 5 | 6 |
| 1 | 5.330965 | 5.491103571 | 5.319365429 | 5.288063214 | 5.243429286 | 5.491784786 |
| 2 | 5.415453929 | 5.522857429 | 5.587036214 | 5.787634429 | 5.523223429 | 5.761788786 |
| 3 | 5.634409857 | 5.785595857 | 6.265779143 | 6.184218357 | 5.815292929 | 5.692836643 |
| 4 | 5.458724 | 6.056173429 | 6.289660857 | 6.134526786 | 6.300679857 | 5.845165786 |
| 5 | 6.0041205 | 6.303179857 | 6.5816925 | 6.232976 | 6.437443571 | 6.364609429 |
| 6 | 5.7755145 | 6.073829571 | 6.238960786 | 6.436237429 | 6.202503571 | 6.067524143 |
| **Liu Songnian: Hanging Scroll Figure Painting (Cohort D1)** | | | | | | |
| V | 1 | 2 | 3 | 4 | 5 | 6 |
| 1 | 6.038226625 | 6.167855125 | 6.2625675 | 6.1602465 | 6.004294625 | 5.963239375 |
| 2 | 6.223475125 | 6.508425375 | 6.637757875 | 6.5992535 | 6.09680975 | 5.95185 |
| 3 | 6.734366 | 6.776007 | 6.729408 | 6.457457875 | 6.42862325 | 6.264632875 |
| 4 | 6.78943125 | 6.893999625 | 6.809143625 | 6.870757125 | 6.7688375 | 6.419301875 |
| 5 | 6.93195875 | 7.107636 | 6.93108225 | 6.927252625 | 7.021503375 | 6.52857175 |
| 6 | 6.419648125 | 6.728910625 | 6.657282 | 6.47498175 | 6.19893 | 6.040149875 |

**Tab.13 Quartile Distribution of Block Means**

| **Cohort** | **Min** | **Q1 (25th Percentile)** | **Median (Q2)** | **Q3 (75th Percentile)** | **Max** |
| --- | --- | --- | --- | --- | --- |
| A1 | 5.243429286 | 5.522857429 | 5.815292929 | 6.232976 | 6.5816925 |
| D1 | 5.95185 | 6.19893 | 6.508425375 | 6.776007 | 7.107636 |

**Tab.14 Block-Mean Visualizations**

| **Sesshū Tōyō (A1)** | **Liu Songnian (D1)** |
| --- | --- |
| 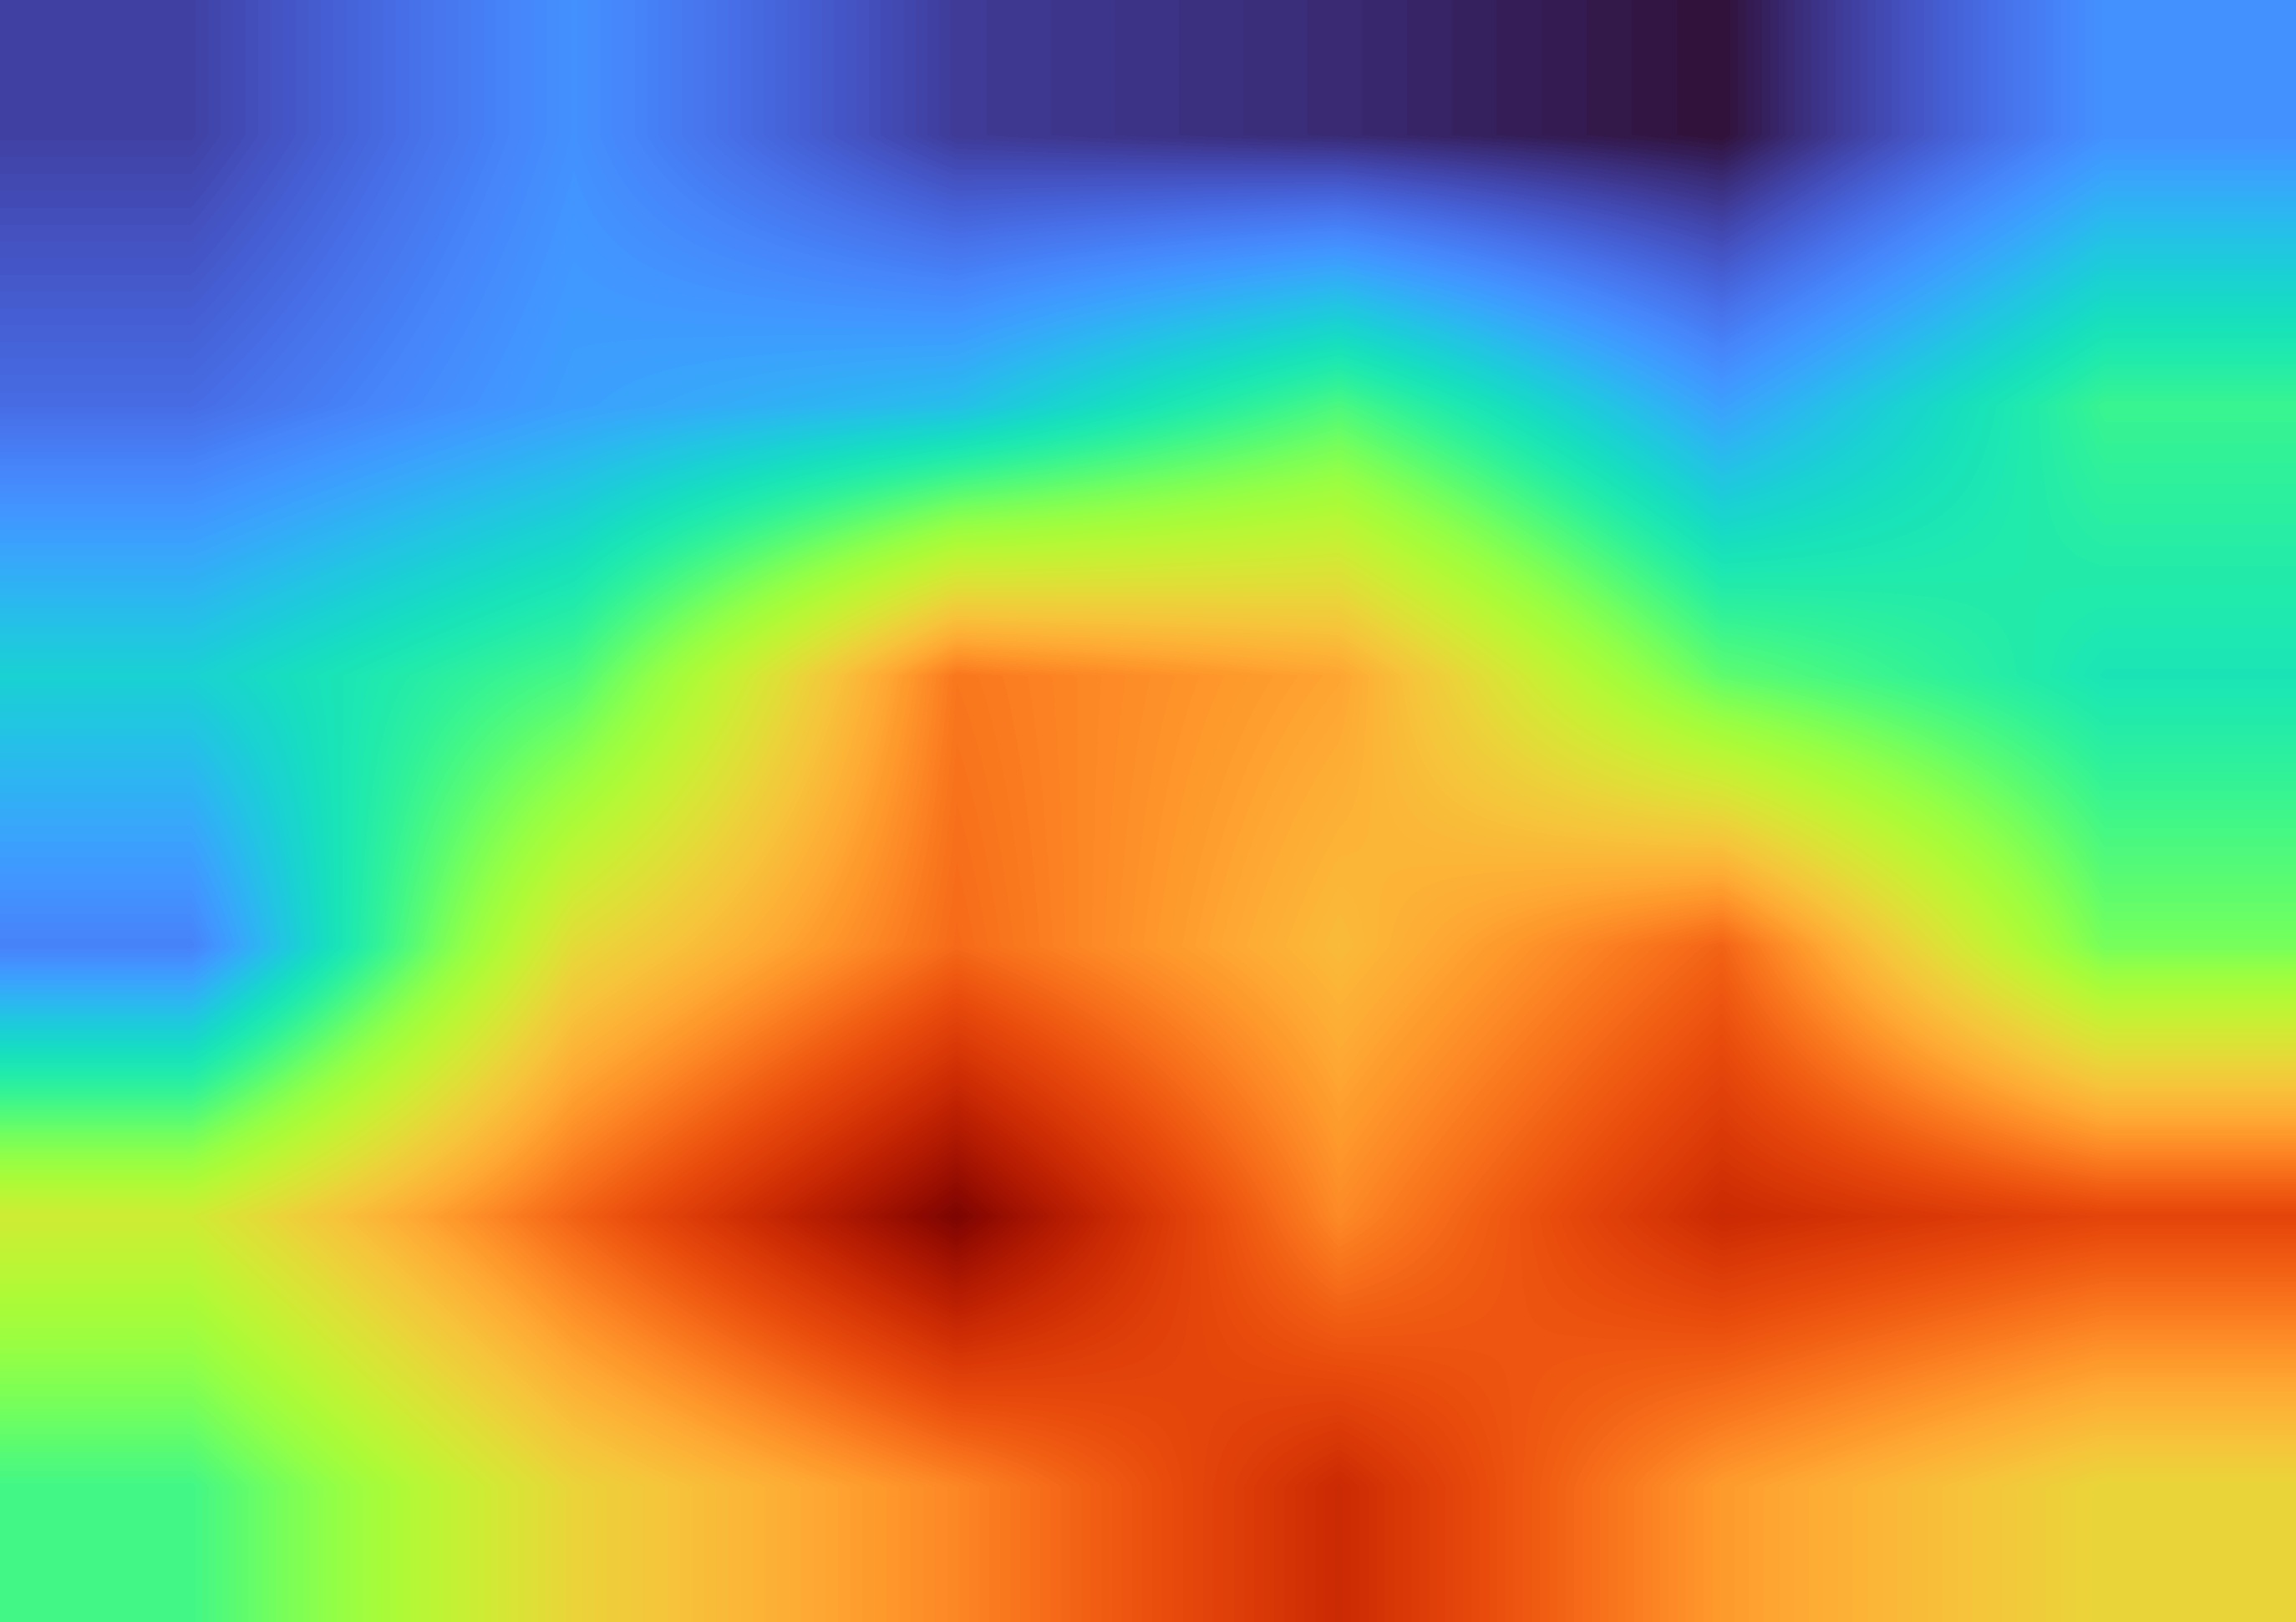 | 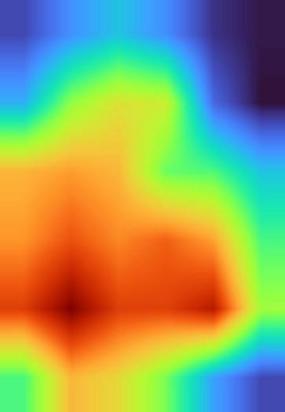 |
